# Supplementary material for: Semi-transparent, conductive thin films of electrochemical exfoliated graphene
Source: Royal Society of Chemistry journal article supplement (doi:10.1039/c6ra04250c), 2016-01-01
Supplement: c6ra04250c1.pdf [file c6ra04250c1.pdf]

## Supporting information

**Table S1.** Values of lateral size of graphene sheets, transmittance and sheet resistance of thin films depend on production method.

| No. | Production method                                                                                                       | Lateral size of graphene sheets ( $\mu\text{m}$ ) | Transmittance (%) | Sheet resistance ( $\Omega/\text{sq}$ ) | Ref. |
|-----|-------------------------------------------------------------------------------------------------------------------------|---------------------------------------------------|-------------------|-----------------------------------------|------|
| 1   | thermal reduction of GO at 1100 °C                                                                                      | 0.2-2.5                                           | /                 | 1.8±0.08k                               | 5    |
| 2   | thermal reduction at 1100°C of spin-coated GO thin films                                                                | 0.36                                              | 80                | 10 <sup>2</sup> -10 <sup>3</sup>        | 27   |
| 3   | combination of chemical and thermal reduction of GO thin films                                                          | 7                                                 | 65                | 70k                                     | 28   |
| 4   | graphene sheets produced by CVD                                                                                         | Centimeter scale                                  | 97.4              | 120                                     | 2    |
| 5   | chemical reduction of GO thin films                                                                                     | 2                                                 | 80                | 350                                     | 29   |
| 6   | graphite dispersion in surfactant-water solution                                                                        | < 1 $\mu\text{m}$                                 | 62                | 970k                                    | 30   |
| 7   | graphene prepared by micromechanical cleavage of graphite                                                               | < 1 $\mu\text{m}$                                 | 98                | 400                                     | 3    |
| 8   | graphite exfoliation in water-surfactant solution                                                                       | < 1 $\mu\text{m}$                                 | 90                | 10M–10k                                 | 31   |
| 9   | graphene nanosheet film was formed via self-assembly at the liquid-liquid interface                                     | 8-10 $\mu\text{m}$                                | 70                | 10 <sup>2</sup>                         | 32   |
| 10  | electrochemical exfoliation of highly oriented pyrolytic graphite                                                       | 4 $\mu\text{m}$                                   | 96                | 43k                                     | 20   |
| 11  | graphene prepared from easily soluble graphite                                                                          | few $\mu\text{m}$                                 | 80                | 3.56k                                   | 33   |
| 12  | electrochemical exfoliation of graphite into graphene in aqueous solutions of inorganic salts                           | 18.7 $\mu\text{m}$                                | 80                | 1.81k                                   | 34   |
| 13  | electrochemical exfoliation of highly oriented pyrolytic graphite                                                       | Up to 2 $\mu\text{m}$                             | 76                | 440                                     | 35   |
| 14  | spin-coating of graphene oxide (GO) aqueous dispersions, or vacuum-filtration of liquid-phase exfoliated (LPE) graphene | /                                                 | /                 | 100k                                    | 36   |
